# Supplementary material for: Toxicity Study and Quantitative Evaluation of Polyethylene Microplastics in ICR Mice
Source: MDPI journal article supplement (doi:10.3390/polym14030402), 2022-01-20
Supplement: s1 [file s1]

**a**

[illegible][illegible]
